# Supplementary material for: Novel Cytonuclear Combinations Modify Arabidopsis thaliana Seed Physiology and Vigor
Source: PubMed Central journal article supplement (PMC6370702; doi:10.3389/fpls.2019.00032), 2019-02-05
Supplement: Data_Sheet_1.pdf [file Data_Sheet_1.pdf]

### A dormancy experiment

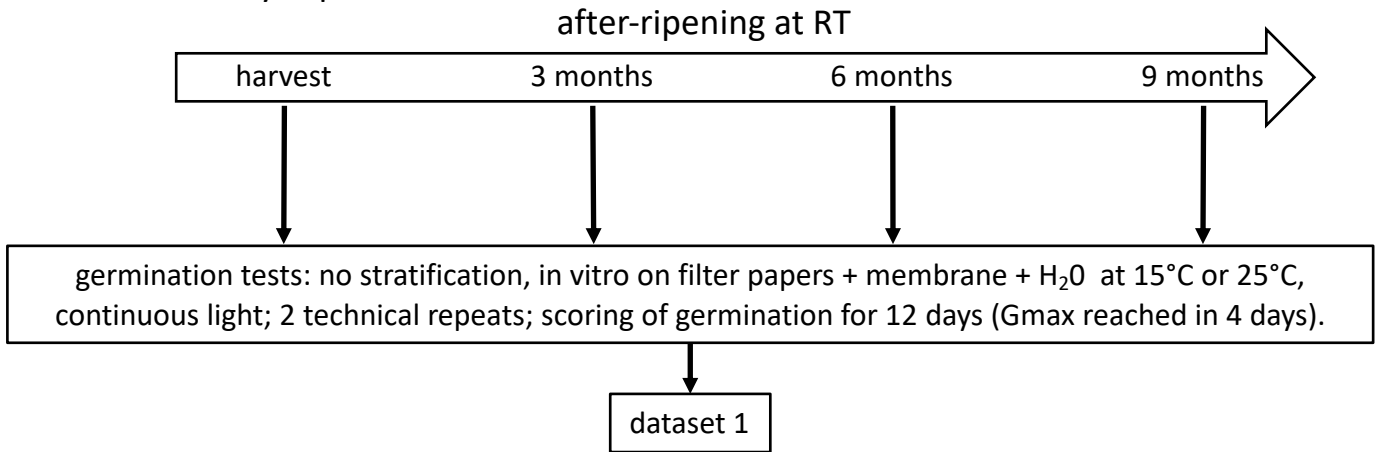

### B germination performance experiment

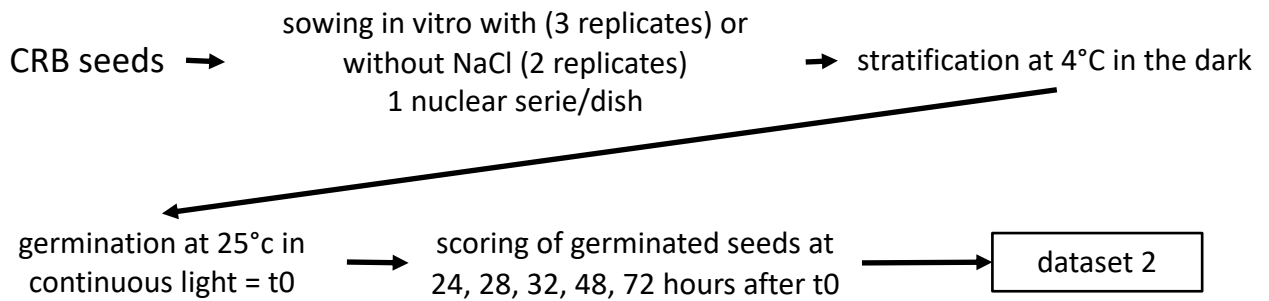

### C controlled deterioration experiment

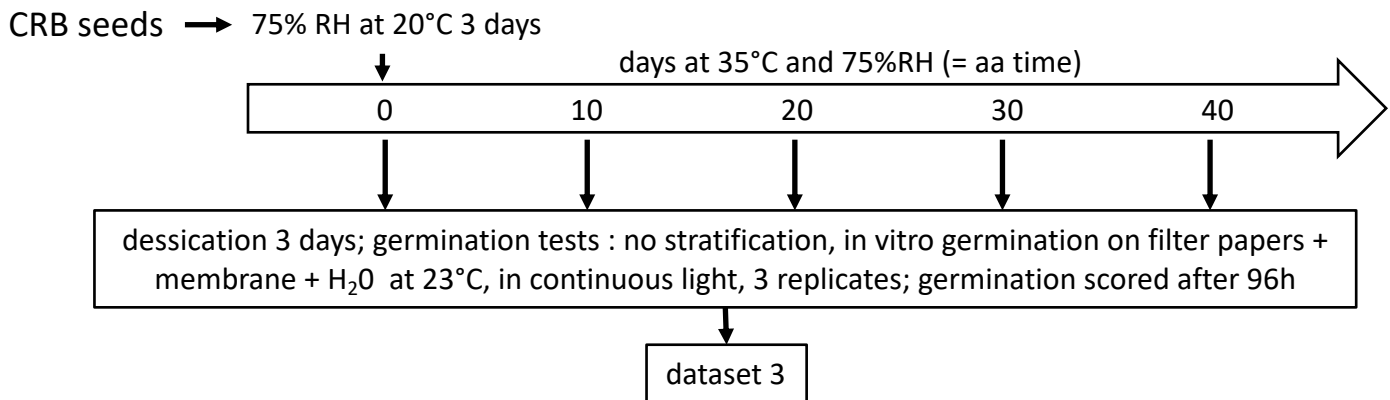

Fig S1 Schematic of experimental procedures for the production of datasets datasets 1, 2 and 3 are provided in Supplementary Tables S3, S5 and S6, respectively
