# Supplementary material for: Novel Cytonuclear Combinations Modify Arabidopsis thaliana Seed Physiology and Vigor
Source: Front Plant Sci. 2019 Feb 5;10:32. doi: 10.3389/fpls.2019.00032 (PMC6370702; doi:10.3389/fpls.2019.00032)
Supplement: Supplementary file 6 [file Table_6.xlsx]

## Sheet: dataset3
#Table S6: dataset 3
Genotype.code	Cytoplasm	Nucleus	aatime	Seed.number	Success
38CV	Sha	Ct-1	0	100	100
38CV	Sha	Ct-1	0	100	100
38CV	Sha	Ct-1	0	100	100
46CV	Oy-0	Ct-1	0	100	100
46CV	Oy-0	Ct-1	0	100	100
46CV	Oy-0	Ct-1	0	100	100
66CV	Cvi-0	Ct-1	0	100	100
66CV	Cvi-0	Ct-1	0	100	100
66CV	Cvi-0	Ct-1	0	100	100
79CV	Bur-0	Ct-1	0	100	100
79CV	Bur-0	Ct-1	0	100	100
79CV	Bur-0	Ct-1	0	100	100
86CV	Blh-1	Ct-1	0	100	100
86CV	Blh-1	Ct-1	0	100	100
86CV	Blh-1	Ct-1	0	100	100
94CV	Ita-0	Ct-1	0	100	100
94CV	Ita-0	Ct-1	0	100	100
94CV	Ita-0	Ct-1	0	100	100
162AV	Ct-1	Ct-1	0	100	100
162AV	Ct-1	Ct-1	0	100	100
162AV	Ct-1	Ct-1	0	100	100
75CV	Ct-1	Jea	0	100	100
75CV	Ct-1	Jea	0	100	100
75CV	Ct-1	Jea	0	100	100
52CV	Jea	Ct-1	0	100	100
52CV	Jea	Ct-1	0	100	100
52CV	Jea	Ct-1	0	100	100
25AV	Jea	Jea	0	100	100
25AV	Jea	Jea	0	100	100
25AV	Jea	Jea	0	100	100
50CV	Jea	Blh-1	0	100	100
50CV	Jea	Blh-1	0	100	100
50CV	Jea	Blh-1	0	100	100
103CV	Jea	Ita-0	0	100	100
103CV	Jea	Ita-0	0	100	100
103CV	Jea	Ita-0	0	100	100
56CV	Jea	Sha	0	100	100
56CV	Jea	Sha	0	100	100
56CV	Jea	Sha	0	100	100
55CV	Jea	Oy-0	0	100	100
55CV	Jea	Oy-0	0	100	100
55CV	Jea	Oy-0	0	100	100
53CV	Jea	Cvi-0	0	100	100
53CV	Jea	Cvi-0	0	100	100
53CV	Jea	Cvi-0	0	100	100
51CV	Jea	Bur-0	0	100	100
51CV	Jea	Bur-0	0	100	100
51CV	Jea	Bur-0	0	100	100
180AV	Blh-1	Blh-1	0	100	100
180AV	Blh-1	Blh-1	0	100	100
180AV	Blh-1	Blh-1	0	100	100
157AV	Ita-0	Ita-0	0	100	100
157AV	Ita-0	Ita-0	0	100	100
157AV	Ita-0	Ita-0	0	100	100
236AV	Sha	Sha	0	100	100
236AV	Sha	Sha	0	100	100
236AV	Sha	Sha	0	100	100
224AV	Oy-0	Oy-0	0	100	100
224AV	Oy-0	Oy-0	0	100	100
224AV	Oy-0	Oy-0	0	100	100
166AV	Cvi-0	Cvi-0	0	100	100
166AV	Cvi-0	Cvi-0	0	100	100
166AV	Cvi-0	Cvi-0	0	100	100
172AV	Bur-0	Bur-0	0	100	100
172AV	Bur-0	Bur-0	0	100	100
172AV	Bur-0	Bur-0	0	100	100
38CV	Sha	Ct-1	10	100	91
38CV	Sha	Ct-1	10	100	93
38CV	Sha	Ct-1	10	100	92
46CV	Oy-0	Ct-1	10	100	93
46CV	Oy-0	Ct-1	10	100	92
46CV	Oy-0	Ct-1	10	100	92
66CV	Cvi-0	Ct-1	10	100	93
66CV	Cvi-0	Ct-1	10	100	92
66CV	Cvi-0	Ct-1	10	100	92
79CV	Bur-0	Ct-1	10	100	93
79CV	Bur-0	Ct-1	10	100	93
79CV	Bur-0	Ct-1	10	100	93
86CV	Blh-1	Ct-1	10	100	90
86CV	Blh-1	Ct-1	10	100	92
86CV	Blh-1	Ct-1	10	100	91
94CV	Ita-0	Ct-1	10	100	93
94CV	Ita-0	Ct-1	10	100	93
94CV	Ita-0	Ct-1	10	100	93
162AV	Ct-1	Ct-1	10	100	95
162AV	Ct-1	Ct-1	10	100	92
162AV	Ct-1	Ct-1	10	100	93
75CV	Ct-1	Jea	10	100	90
75CV	Ct-1	Jea	10	100	94
75CV	Ct-1	Jea	10	100	90
52CV	Jea	Ct-1	10	100	93
52CV	Jea	Ct-1	10	100	92
52CV	Jea	Ct-1	10	100	92
25AV	Jea	Jea	10	100	92
25AV	Jea	Jea	10	100	91
25AV	Jea	Jea	10	100	92
50CV	Jea	Blh-1	10	100	93
50CV	Jea	Blh-1	10	100	94
50CV	Jea	Blh-1	10	100	92
103CV	Jea	Ita-0	10	100	92
103CV	Jea	Ita-0	10	100	91
103CV	Jea	Ita-0	10	100	92
56CV	Jea	Sha	10	100	94
56CV	Jea	Sha	10	100	94
56CV	Jea	Sha	10	100	95
55CV	Jea	Oy-0	10	100	96
55CV	Jea	Oy-0	10	100	95
55CV	Jea	Oy-0	10	100	94
53CV	Jea	Cvi-0	10	100	90
53CV	Jea	Cvi-0	10	100	91
53CV	Jea	Cvi-0	10	100	91
51CV	Jea	Bur-0	10	100	90
51CV	Jea	Bur-0	10	100	91
51CV	Jea	Bur-0	10	100	91
180AV	Blh-1	Blh-1	10	100	94
180AV	Blh-1	Blh-1	10	100	95
180AV	Blh-1	Blh-1	10	100	94
157AV	Ita-0	Ita-0	10	100	92
157AV	Ita-0	Ita-0	10	100	92
157AV	Ita-0	Ita-0	10	100	92
236AV	Sha	Sha	10	100	94
236AV	Sha	Sha	10	100	96
236AV	Sha	Sha	10	100	95
224AV	Oy-0	Oy-0	10	100	95
224AV	Oy-0	Oy-0	10	100	95
224AV	Oy-0	Oy-0	10	100	95
166AV	Cvi-0	Cvi-0	10	100	93
166AV	Cvi-0	Cvi-0	10	100	94
166AV	Cvi-0	Cvi-0	10	100	94
172AV	Bur-0	Bur-0	10	100	93
172AV	Bur-0	Bur-0	10	100	92
172AV	Bur-0	Bur-0	10	100	93
38CV	Sha	Ct-1	20	100	80
38CV	Sha	Ct-1	20	100	72
38CV	Sha	Ct-1	20	100	70
46CV	Oy-0	Ct-1	20	100	70
46CV	Oy-0	Ct-1	20	100	66
46CV	Oy-0	Ct-1	20	100	60
66CV	Cvi-0	Ct-1	20	100	50
66CV	Cvi-0	Ct-1	20	100	54
66CV	Cvi-0	Ct-1	20	100	52
79CV	Bur-0	Ct-1	20	100	72
79CV	Bur-0	Ct-1	20	100	74
79CV	Bur-0	Ct-1	20	100	70
86CV	Blh-1	Ct-1	20	100	40
86CV	Blh-1	Ct-1	20	100	39
86CV	Blh-1	Ct-1	20	100	46
94CV	Ita-0	Ct-1	20	100	39
94CV	Ita-0	Ct-1	20	100	38
94CV	Ita-0	Ct-1	20	100	34
162AV	Ct-1	Ct-1	20	100	33
162AV	Ct-1	Ct-1	20	100	30
162AV	Ct-1	Ct-1	20	100	32
75CV	Ct-1	Jea	20	100	63
75CV	Ct-1	Jea	20	100	55
75CV	Ct-1	Jea	20	100	66
52CV	Jea	Ct-1	20	100	63
52CV	Jea	Ct-1	20	100	35
52CV	Jea	Ct-1	20	100	66
25AV	Jea	Jea	20	100	30
25AV	Jea	Jea	20	100	33
25AV	Jea	Jea	20	100	36
50CV	Jea	Blh-1	20	100	77
50CV	Jea	Blh-1	20	100	52
50CV	Jea	Blh-1	20	100	45
103CV	Jea	Ita-0	20	100	83
103CV	Jea	Ita-0	20	100	82
103CV	Jea	Ita-0	20	100	85
56CV	Jea	Sha	20	100	88
56CV	Jea	Sha	20	100	84
56CV	Jea	Sha	20	100	83
55CV	Jea	Oy-0	20	100	77
55CV	Jea	Oy-0	20	100	75
55CV	Jea	Oy-0	20	100	71
53CV	Jea	Cvi-0	20	100	80
53CV	Jea	Cvi-0	20	100	82
53CV	Jea	Cvi-0	20	100	88
51CV	Jea	Bur-0	20	100	80
51CV	Jea	Bur-0	20	100	82
51CV	Jea	Bur-0	20	100	84
180AV	Blh-1	Blh-1	20	100	40
180AV	Blh-1	Blh-1	20	100	42
180AV	Blh-1	Blh-1	20	100	44
157AV	Ita-0	Ita-0	20	100	38
157AV	Ita-0	Ita-0	20	100	36
157AV	Ita-0	Ita-0	20	100	34
236AV	Sha	Sha	20	100	40
236AV	Sha	Sha	20	100	42
236AV	Sha	Sha	20	100	43
224AV	Oy-0	Oy-0	20	100	40
224AV	Oy-0	Oy-0	20	100	41
224AV	Oy-0	Oy-0	20	100	44
166AV	Cvi-0	Cvi-0	20	100	30
166AV	Cvi-0	Cvi-0	20	100	31
166AV	Cvi-0	Cvi-0	20	100	33
172AV	Bur-0	Bur-0	20	100	42
172AV	Bur-0	Bur-0	20	100	44
172AV	Bur-0	Bur-0	20	100	46
38CV	Sha	Ct-1	30	100	30
38CV	Sha	Ct-1	30	100	31
38CV	Sha	Ct-1	30	100	32
46CV	Oy-0	Ct-1	30	100	25
46CV	Oy-0	Ct-1	30	100	21
46CV	Oy-0	Ct-1	30	100	22
66CV	Cvi-0	Ct-1	30	100	20
66CV	Cvi-0	Ct-1	30	100	18
66CV	Cvi-0	Ct-1	30	100	19
79CV	Bur-0	Ct-1	30	100	20
79CV	Bur-0	Ct-1	30	100	19
79CV	Bur-0	Ct-1	30	100	17
86CV	Blh-1	Ct-1	30	100	12
86CV	Blh-1	Ct-1	30	100	18
86CV	Blh-1	Ct-1	30	100	16
94CV	Ita-0	Ct-1	30	100	19
94CV	Ita-0	Ct-1	30	100	17
94CV	Ita-0	Ct-1	30	100	15
162AV	Ct-1	Ct-1	30	100	10
162AV	Ct-1	Ct-1	30	100	13
162AV	Ct-1	Ct-1	30	100	14
75CV	Ct-1	Jea	30	100	12
75CV	Ct-1	Jea	30	100	18
75CV	Ct-1	Jea	30	100	16
52CV	Jea	Ct-1	30	100	10
52CV	Jea	Ct-1	30	100	12
52CV	Jea	Ct-1	30	100	14
25AV	Jea	Jea	30	100	9
25AV	Jea	Jea	30	100	7
25AV	Jea	Jea	30	100	7
50CV	Jea	Blh-1	30	100	9
50CV	Jea	Blh-1	30	100	8
50CV	Jea	Blh-1	30	100	11
103CV	Jea	Ita-0	30	100	21
103CV	Jea	Ita-0	30	100	23
103CV	Jea	Ita-0	30	100	25
56CV	Jea	Sha	30	100	33
56CV	Jea	Sha	30	100	31
56CV	Jea	Sha	30	100	35
55CV	Jea	Oy-0	30	100	30
55CV	Jea	Oy-0	30	100	32
55CV	Jea	Oy-0	30	100	30
53CV	Jea	Cvi-0	30	100	33
53CV	Jea	Cvi-0	30	100	35
53CV	Jea	Cvi-0	30	100	39
51CV	Jea	Bur-0	30	100	33
51CV	Jea	Bur-0	30	100	35
51CV	Jea	Bur-0	30	100	37
180AV	Blh-1	Blh-1	30	100	10
180AV	Blh-1	Blh-1	30	100	11
180AV	Blh-1	Blh-1	30	100	14
157AV	Ita-0	Ita-0	30	100	11
157AV	Ita-0	Ita-0	30	100	13
157AV	Ita-0	Ita-0	30	100	15
236AV	Sha	Sha	30	100	20
236AV	Sha	Sha	30	100	22
236AV	Sha	Sha	30	100	24
224AV	Oy-0	Oy-0	30	100	22
224AV	Oy-0	Oy-0	30	100	24
224AV	Oy-0	Oy-0	30	100	25
166AV	Cvi-0	Cvi-0	30	100	7
166AV	Cvi-0	Cvi-0	30	100	9
166AV	Cvi-0	Cvi-0	30	100	13
172AV	Bur-0	Bur-0	30	100	13
172AV	Bur-0	Bur-0	30	100	15
172AV	Bur-0	Bur-0	30	100	17
38CV	Sha	Ct-1	40	100	0
38CV	Sha	Ct-1	40	100	0
38CV	Sha	Ct-1	40	100	0
46CV	Oy-0	Ct-1	40	100	0
46CV	Oy-0	Ct-1	40	100	0
46CV	Oy-0	Ct-1	40	100	0
66CV	Cvi-0	Ct-1	40	100	0
66CV	Cvi-0	Ct-1	40	100	0
66CV	Cvi-0	Ct-1	40	100	0
79CV	Bur-0	Ct-1	40	100	0
79CV	Bur-0	Ct-1	40	100	0
79CV	Bur-0	Ct-1	40	100	0
86CV	Blh-1	Ct-1	40	100	0
86CV	Blh-1	Ct-1	40	100	0
86CV	Blh-1	Ct-1	40	100	0
94CV	Ita-0	Ct-1	40	100	0
94CV	Ita-0	Ct-1	40	100	0
94CV	Ita-0	Ct-1	40	100	0
162AV	Ct-1	Ct-1	40	100	0
162AV	Ct-1	Ct-1	40	100	0
162AV	Ct-1	Ct-1	40	100	0
75CV	Ct-1	Jea	40	100	0
75CV	Ct-1	Jea	40	100	0
75CV	Ct-1	Jea	40	100	0
52CV	Jea	Ct-1	40	100	0
52CV	Jea	Ct-1	40	100	0
52CV	Jea	Ct-1	40	100	0
25AV	Jea	Jea	40	100	0
25AV	Jea	Jea	40	100	0
25AV	Jea	Jea	40	100	0
50CV	Jea	Blh-1	40	100	0
50CV	Jea	Blh-1	40	100	0
50CV	Jea	Blh-1	40	100	0
103CV	Jea	Ita-0	40	100	0
103CV	Jea	Ita-0	40	100	0
103CV	Jea	Ita-0	40	100	0
56CV	Jea	Sha	40	100	0
56CV	Jea	Sha	40	100	0
56CV	Jea	Sha	40	100	0
55CV	Jea	Oy-0	40	100	0
55CV	Jea	Oy-0	40	100	0
55CV	Jea	Oy-0	40	100	0
53CV	Jea	Cvi-0	40	100	0
53CV	Jea	Cvi-0	40	100	0
53CV	Jea	Cvi-0	40	100	0
51CV	Jea	Bur-0	40	100	0
51CV	Jea	Bur-0	40	100	0
51CV	Jea	Bur-0	40	100	0
180AV	Blh-1	Blh-1	40	100	0
180AV	Blh-1	Blh-1	40	100	0
180AV	Blh-1	Blh-1	40	100	0
157AV	Ita-0	Ita-0	40	100	0
157AV	Ita-0	Ita-0	40	100	0
157AV	Ita-0	Ita-0	40	100	0
236AV	Sha	Sha	40	100	0
236AV	Sha	Sha	40	100	0
236AV	Sha	Sha	40	100	0
224AV	Oy-0	Oy-0	40	100	0
224AV	Oy-0	Oy-0	40	100	0
224AV	Oy-0	Oy-0	40	100	0
166AV	Cvi-0	Cvi-0	40	100	0
166AV	Cvi-0	Cvi-0	40	100	0
166AV	Cvi-0	Cvi-0	40	100	0
172AV	Bur-0	Bur-0	40	100	0
172AV	Bur-0	Bur-0	40	100	0
172AV	Bur-0	Bur-0	40	100	0
