# Supplementary material for: Novel Cytonuclear Combinations Modify Arabidopsis thaliana Seed Physiology and Vigor
Source: Front Plant Sci. 2019 Feb 5;10:32. doi: 10.3389/fpls.2019.00032 (PMC6370702; doi:10.3389/fpls.2019.00032)
Supplement: Supplementary file 7 [file Table_7.xlsx]

## Sheet: S7.Ageing Cyto Effects
#Table S7: results of tests for significant effect of cytoplasms on germination after CDT
#each line corresponds to a contrast between two cytoplasms
# the results in the Ct-1 (Ct1 nuc) and the Sha (Sha nuc) nuclear backgrounds are given
#sign of the contrast: positive means that germination of the genotype with Cytoplasm1 germinated better than genotype with Cytoplasm2 after CDT, negative means the opposite
# ns, not significant; pvalues ***<0.001<**<0.01<*<0.05
Cytoplasm1	Cytoplasm2	Ct1 nuc		Sha nuc
		Ct1.Bonf	Sign of the contrast	Sha.Bonf	Sign of the contrast
Blh-1	Bur-0	ns		***	+
Blh-1	Ct-1	ns		***	+
Blh-1	Cvi-0	ns		***	+
Blh-1	Ita-0	ns		**	+
Blh-1	Jea	ns		***	+
Blh-1	Oy-0	ns		***	+
Blh-1	Sha	**	-	***	+
Bur-0	Ct-1	*	+	ns
Bur-0	Cvi-0	ns		ns
Bur-0	Ita-0	ns		**	-
Bur-0	Jea	ns		ns
Bur-0	Oy-0	ns		ns
Bur-0	Sha	ns		ns
Ct-1	Cvi-0	ns		ns
Ct-1	Ita-0	ns		ns
Ct-1	Jea	ns		ns
Ct-1	Oy-0	ns		ns
Ct-1	Sha	***	-	ns
Cvi-0	Ita-0	ns		ns
Cvi-0	Jea	ns		ns
Cvi-0	Oy-0	ns		ns
Cvi-0	Sha	ns		ns
Ita-0	Jea	ns		ns
Ita-0	Oy-0	ns		ns
Ita-0	Sha	*	-	*	+
Jea	Oy-0	ns		ns
Jea	Sha	ns		ns
Oy-0	Sha	ns		ns
